# Supplementary material for: Integrating genomic alterations in diffuse large B-cell lymphoma identifies new relevant pathways and potential therapeutic targets
Source: PubMed Central journal article supplement — Leukemia. 2017 Sep 5;32(3):675–84. doi: 10.1038/leu.2017.251 (PMC5843901; doi:10.1038/leu.2017.251), 2017-09-05

1 cohorts.

2 • Table S12. Baseline clinical features of the patients according to mutational status of  
3 the NOTCH pathway, TP53/CDKN2A, and JAK/STAT pathway in the validation series.

4 • Table S13. *In silico* drug prescription of DLBCL patients.

5 • Table S14. Primers used for Sanger sequencing, Access Array Fluidigm and Nextera  
6 XT approaches.

7

## 8 **Supplemental Figure legends**

9 • Figure S1. PFS and OS in the initial and validation series.

10 • Figure S2. Pipeline followed to filter potential driver mutations in 150 DLBCL  
11 samples. \*SIFT was only used for mutations in which a definitive score was not  
12 provided by Mutation Assessor (MA).

13 • Figure S3. Genetic alterations characterized in 150 DLBCL patients.

14 • Figure S4. Alterations of *TMEM30A*, *PRDM1*, *SGK1*, *TNFAIP3* in the common  
15 deleted 6q14-q23 region.

16 • Figure S5. Chromothripsis-like patterns detected in DLBCL cases. (a) Amplifications  
17 of *miR17-92-13q31.3* in 3 cases of DLBCL with a chromothripsis-like pattern on  
18 chromosome 13. (b) Amplifications of *REL* and *BCL11A* genes in one DLBCL case  
19 with a chromothripsis-like pattern in chromosome 2.

20 • Figure S6. Gene set enrichment analysis (GSEA) comparing *SGK1* and NOTCH  
21 pathway mutated *vs* unmutated cases.

22

23

## 24 **Supplemental Methods**

25

### 26 **Gene Selection**

27 We selected 106 genes from previous whole exome sequencing studies of diffuse large  
28 B-cell lymphomas (DLBCL) and a large number of studies that analyzed the mutations  
29 of individual or small sets of genes in these lymphomas (Supplemental Table S2).<sup>1-32</sup> In  
30 total, 3951 different genes were initially reviewed mainly from whole exome  
31 sequencing studies.<sup>13, 16, 24, 32</sup> Genes were selected according to the following criteria:  
32 Recurrent mutated genes in more than 10% of DLBCL in any of the studies, mutated

1 genes in which a somatic mutation was confirmed in at least 2 cases or annotated in  
2 COSMIC as somatic, and genes located on frequently altered regions in DLBCL. Three  
3 additional criteria were: functional evidence of the pathogenic role of the mutated gene  
4 in DLBCL, genes involved in pathways relevant for DLBCL, and drug target genes (45  
5 genes were selected because they had been considered as drug targets in clinical trials  
6 according to the public database (<http://www.cancer.gov/clinicaltrials>). Some additional  
7 genes were added because they were reported in other lymphomas or could complement  
8 some of the pathways of interest (*BLM*, *BRCA2*, *CCNH*, *FBXW7*, *HIST1H2BD*, *IDH1*,  
9 *ID3*, *MEF2C*, *MKI67*, *MPL*, *POU2F2*, *TCF3*, *SEMA5A*, and *WHSC1*). We excluded  
10 several genes initially selected according to previous criteria for different reasons such  
11 as difficulties for primer design (e.g *P2RY8*) or because they were known to be late  
12 replication genes, or because of their large size (*PCLO*, *LRP1B*, *MUC16* and *UNC5D*)  
13 and the fact that they have been reported to accumulate large numbers of passenger  
14 mutations.<sup>33</sup>

15

#### 16 **Target next generation sequencing**

17 Two-hundred twenty-five nanograms of genomic DNA extracted from frozen tumor  
18 tissues were used to generate NGS libraries. Five 10 µm-thick sections per sample were  
19 used to extract DNA using the QIAamp DNA Mini Kit according to the manufacturer's  
20 instructions (Qiagen). In the initial series, libraries were generated using HaloPlex  
21 technology (Agilent technologies, Santa Clara, CA; following the manufacturer's  
22 protocol). The customized HaloPlex kit included all exons and their flanking regions  
23 (Supplemental Table S2). Libraries were sequenced in a MiSeq instrument (Illumina,  
24 San Diego, CA) in a paired-end run of 150 bp. The average sequencing coverage across  
25 regions was 600x and a coverage >20x was obtained in >98.7% of the target regions.

26

27 Libraries of the validation cohort were generated using Access-Array technology  
28 (Fluidigm) and Nextera XT procedure (Illumina). Briefly, primers to amplify *TP53*  
29 (exons 4-10), *MYD88* (exons 2-8), *NOTCH2* (exon 34), *CCND3* (exon 5), *SGK1* (all  
30 exons), *STAT3* (exons 20-21), *STAT6* (exons 11-17), *PIMI* (exons 1-14), *FBXW7* (all  
31 exons) and *TMEM30A* (exons 1-7) regions were designed with the D3-Assay Design  
32 web-based tool (Fluidigm) (Supplemental Table S14). Libraries were generated using

1 50 ng of total DNA in the Access-Array system with a BioMark thermal cyclers  
2 (Fluidigm) and sequenced in a MiSeq instrument with a paired-end run of 210 bp.  
3 Specific primers to sequence *NOTCH1* (exon 34), *SOCS1* (all exons) and *FOXO1* (all  
4 exons) were designed using the Primer3 program (Supplemental Table S14). Long-PCR  
5 amplifications were performed using the KAPA HiFi DNA Polymerase HotStart  
6 ReadyMix (Kapa Biosystems) and normalized with the SequelPrep Normalization Plate  
7 kit (Invitrogen). Libraries were generated with the Nextera XT DNA Library  
8 Preparation Kit (Illumina) and sequenced with a 2x150 bp MiSeq run. The median  
9 sequencing coverage across region was 555x (range 131-933) and a coverage >20x was  
10 obtained in >98.7% of the target regions.

11

## 12 **Variant calling algorithms and verification assessment**

13 Two different bioinformatics pipelines were used for the alignment and variant calling,  
14 HD Genome One Research Edition software (DREAMgenics;  
15 <http://www.dreamgenics.com/>) and Agilent SureCall tool  
16 (<http://www.genomics.agilent.com>). FASTQ files generated by MiSeq control software  
17 were processed using the above mentioned algorithms and both were compared.

18

### 19 *Genome One Research Edition software*

20 A new algorithm was developed in cooperation with DREAMgenics.Inc to perform the  
21 alignment, calling and annotation of the variants obtained with Haloplex Libraries. The  
22 allelic frequency cut-off for considering mutations was 5%. All variants were confirmed  
23 by visual inspection. Low coverage calls (total read depth < 10, or mutated allele count  
24 <5 calls) and 17 low quality calls were excluded. We excluded for further analysis all  
25 synonymous and intron variants and known polymorphisms included in dbSNP  
26 database (dbSNP138), ESP6500 (<http://evs.gs.washington.edu/EVS>) with more than 1%  
27 frequency in European population or in our own database of polymorphisms in Spanish  
28 population.<sup>34</sup>

29

### 30 *Agilent SureCall*

31 We used SureCall tool (ver1.1) with all default settings to analyze sequencing results  
32 and to call the variants. All variants were confirmed by visual inspections. All

1 synonymous variants, intron variants and known polymorphisms included in dbSNP  
2 database (<http://www.ncbi.nlm.nih.gov/SNP/>) or in our own database of polymorphisms  
3 in Spanish population were excluded.<sup>34</sup>

4  
5 Variant calls of both algorithms were integrated and, finally, 1331 calls were selected in  
6 the 150 cases (Supplemental Figure S2 and Supplemental Table S3). To determine the  
7 accuracy of the sequencing method and analytical algorithms, we selected 152 (11%)  
8 variants from these 1331 called variants, and we verified them using Sanger sequencing.  
9 One hundred fifty-one (99%) of these variants were confirmed, indicating the accuracy  
10 of the analysis.

11  
12 For the validation series, the complete bioinformatic analysis, alignment and variant  
13 calling were performed with the MiSeq Reporter Software (MSR, version 2.4.60). All  
14 variants detected by any of these two algorithms were combined and annotated using  
15 ANNOVAR<sup>35</sup> as well as custom scripts. Like in the initial series analysis, we excluded  
16 all synonymous and intron variants and known polymorphisms included in dbSNP  
17 database (dbSNP138), ESP6500 (<http://evs.gs.washington.edu/EVS/>) with more than  
18 1% frequency in European population or in our own database of polymorphisms in  
19 Spanish population.<sup>34</sup>

#### 21 **Sanger sequencing. Verification of NGS results and mutational analysis of** 22 ***CDKN2A* and 3'UTR region of *NOTCH1***

23 Sanger sequencing was used to verify the results of the NGS described above and to  
24 analyze Exon 1alpha, 1beta and 2 of *CDKN2A* and 3'UTR region of *NOTCH1*.<sup>34</sup> PCR  
25 primers were designed using Primer 3 (<http://frodo.wi.mit.edu/primer3>) and purchased  
26 from Sigma-Aldrich (St. Louis, MO). Amplification by PCR was performed using  
27 AmpliTaq Gold DNA Polymerase (Life technologies, Grand Island, NY) or QIAGEN  
28 Multiplex PCR Kit (Qiagen, Madrid, Spain) with 50ng of DNA and 200µM dNTP mix  
29 (Life technologies) following the manufacturer's recommendations. All PCR products  
30 were run in a capillary electrophoresis gel (QIAxcel Advanced System, Qiagen) with  
31 the QIAxcel DNA screening kit (Qiagen). The multiband PCR products were purified  
32 using NucleoSpin Gel and PCR Clean-up (Macherey-Nagel, Bethlehem, PA).

1 Regarding Sanger sequencing, PCR products were cleaned using ExoSAP-IT  
2 (Affymetrix, Santa Clara, CA) and sequenced using ABI Prism BigDye terminator v3.1  
3 (Life technologies) with 5 pmol of each primer. Sequencing reactions were run on an  
4 ABI-3730 automated sequencer (Life Technologies). All sequences were examined with  
5 the Mutation Surveyor DNA Variant Analysis Software (SoftGenetics, State College,  
6 PA). Sequences of the used primers are listed in Supplemental Table S14.

7

8 **Selection of potential driver mutations and verification in germline DNA**

9 Potential driver mutations were selected according to the following criteria  
10 (Supplementary Fig S2): 1) We initially selected 216 “relevant” mutations by manual  
11 curation based on previous reports and COSMIC, including somatic and functional  
12 mutations and mutations clustering in known functional domains<sup>1, 3, 5, 7, 11, 12, 15, 17, 19, 22,</sup>  
13 <sup>25,27,29-31,36-54</sup>. 2) All truncating mutations (n= 274), except two found in known  
14 oncogenes (*MYD88*, *M1I* and *CD79A*, *Q222\**), were also considered as potential driver  
15 events. 3) The potential drivers of the remaining missense and in-frame mutations were  
16 selected based on the functional prediction established by the OncodriveCLUST,  
17 Mutation Assessor (MA) and SIFT algorithm.<sup>55-57</sup> MA and SIFT algorithms were  
18 selected after comparing several methods including these two and CHASM<sup>58</sup>,  
19 CONDEL<sup>59</sup>, FATHMM<sup>60</sup>, Mutation Tester<sup>61</sup>, and Polyphen2 (PPH2)<sup>62</sup>. To select the  
20 most appropriate algorithm we initially explored the performance of each of these  
21 algorithms when distinguishing the variants found in our study that were known  
22 polymorphisms or known somatic recurrent mutations described in COSMIC. In this  
23 particular data set, the scores that better predicted the expected characteristics of the  
24 variant were MA and SIFT, followed by CHASM. We did not observe any benefit in  
25 combining these scores. We selected MA because it showed a narrower score range for  
26 polymorphisms and larger differences between recurrent and non-recurrent COSMIC  
27 entries as compared to SIFT. For those cases in which the MA score could not be  
28 retrieved, we used a SIFT score. Using these two algorithms, 271 out of the 841  
29 missense or in-frame mutations were selected as driver mutations.

30

31 To test the accuracy of our "functional prediction" algorithm for missense mutations, we  
32 selected 92 variants in 32 patients who had germline DNA available. We observed that

1 90% of the mutations classified as functional were somatic (28/31) while 89% of the  
2 germline mutations were classified as non-functional (24/27) (Supplemental Methods  
3 and Supplemental Table S15). The 34 somatic variants predicted as non-functional by  
4 the algorithm were not considered drivers. Taking these three criteria together we  
5 selected 761 potential driver mutations (58% of the total) for the clinicopathological  
6 analysis (Supplemental Figure S2 and Supplemental Table S4).

7

8 **Copy Number and Structural Alteration Analysis**

9 Samples were analyzed using CytoScan HD Array (Affymetrix) according to the  
10 manufacturer's instructions. Scanned data from CytoScan HD were processed by  
11 Chromosome Analysis Suite (Affymetrix) for subsequent analyses. The analytical  
12 programs of “Nexus CN 7.5 Discovery edition” (Biodiscovery, Hawthorne, CA), SNP-  
13 FASST2 (Biodiscovery) and ASCAT (<http://heim.ifi.uio.no/bioinf/Projects/ASCAT/>)  
14 were used to analyze genomic alterations. Minimal common regions (MCRs) of gains  
15 and losses were picked up using an R custom script. The most frequently altered regions  
16 ( $\geq 20\%$ ) were extracted and selected by visual inspection of two different observers  
17 (K.K. and I.S.). A total number of 34 MCRs were selected. Then ABC and GCB type  
18 DLBCL cases were analyzed separately and MCRs specific for each molecular subtype  
19 were identified.

20

21 Genomic alterations satisfying the following criteria were regarded as “deep losses” or  
22 “high gains”: (1) An amplitude of an alteration was more than 1 or less than -1 in log2  
23 ratio. (2) Deeper and shorter gains or losses were identified in longer and shallower  
24 alterations (gain in gain or loss in loss). “Homozygous loss” and “amplification” were  
25 defined as “deep loss” and “high gain” regions less than 5Mb, respectively. 6q14.1 and  
26 10q23.31 regions, in which *TMEM30A* and *PTEN* were located respectively, were  
27 further added to the alteration list because they showed recurrent homozygous losses.  
28 Additionally, 17 regions previously reported were included.<sup>3, 63-70</sup> In total, 62  
29 chromosomal regions were selected for further analysis including clinical correlation.  
30 Loss of heterozygosity (LOH) without genomic alteration (CNN-LOH) was considered  
31 when the size of the altered region was  $>5\text{Mb}$ . Cases were regarded to have

1 chromothripsis when at least seven switches between two or more copy number states  
2 were detected on an individual chromosome in which LOH was retained.<sup>71</sup>  
3 The copy number alterations of *CDKN2A* were investigated in the validations series  
4 using TaqMan<sup>®</sup> Genotyping Master Mix and TaqMan<sup>®</sup> Copy Number Assay  
5 Hs02738179\_cn for *CDKN2A*. DNA was analyzed using duplicates in a  
6 StepOnePlus<sup>™</sup> Real-Time PCR System (Thermo Fisher Scientific). Relative  
7 quantification of the gene locus was analyzed with the  $2^{-\Delta\Delta C_t}$  method using TaqMan<sup>®</sup>  
8 Copy Number Reference Assay RNaseP as the endogenous control and JVM-2 cell line  
9 (wild type for *CDKN2A*) as mathematical calibrator. We included the cell line MAVER-  
10 1 as a control of homozygous deletion.

11

12 Interphase fluorescence *in situ* hybridization (FISH) analysis was carried out on FFPE  
13 sections to detect *MYC*, *BCL2* and *BCL6* breaks using specific probes supplied by  
14 Abbott Molecular (Des Plaines, IL, USA) following the manufacturer's specifications.  
15 The FISH probe used for the *BCL6* FISH analysis was the LSI *BCL6* (ABR) Break  
16 Apart Rearrangement Probe, (Abbot Molecular Des Plaines, USA) that identifies both  
17 breakpoints located in the major and alternative breakpoint region.

18

### 19 **Cell of origin determination**

20 The molecular cell of origin (COO) of the tumors was established using the Gene Chip  
21 Human Genome U133 Plus 2.0 arrays (Affymetrix, Santa Clara, CA) and/or the  
22 Lymph2Cx assay (Nanostring technologies, Seattle, WA).<sup>72</sup> To determine the COO in  
23 the training series, total RNA was extracted from frozen tissues using RNeasy Kit  
24 (Qiagen) following the manufacturer's instructions. For the validation series, total RNA  
25 was obtained from formalin-fixed paraffin-embedded material (FFPE-M). Five 10  $\mu$ m-  
26 thick sections per sample were used to extract RNA using the RNeasy FFPE Kit  
27 according to the manufacturer's instructions (Qiagen). RNA integrity from frozen  
28 specimens was examined with the Agilent 2100 Bioanalyzer (Agilent Technologies)  
29 and only high-quality RNA samples were hybridized to Affymetrix Human Genome  
30 Array U219 array plates according to Affymetrix standard protocols. Summarized  
31 expression values were computed using the robust multichip average approach



1 implemented in the Expression Console Software (Affymetrix Inc.). COO was  
2 determined as previously reported.<sup>73</sup> For RNA extracted from FFPE tissues we used a  
3 digital multiplexed gene expression analysis with the nCounter/Nanostring technology  
4 following the established protocol.<sup>72</sup> Samples were classified as GCB, ABC and  
5 Unclassified (UC) subtypes using the algorithm previously described.<sup>72</sup>

## 6 7 **Gene expression analysis**

8 To verify the biological relevance of NOTCH pathway activation in DLBCL, we  
9 compared the gene expression profiles of 12 cases with NOTCH pathway mutations (5  
10 *NOTCH2*, 4 *SGK1*, 2 *NOTCH1*, 1 *FBWX7*) and 27 with wild-type genes of this pathway  
11 using Affymetrix® Human Genome U219. A gene set enrichment analysis (GSEA) was  
12 performed comparing *SGK1* mutated and unmutated cases. We tested the KEGG  
13 NOTCH signaling pathway, two lists of genes upregulated by NOTCH signaling and  
14 two other gene-sets downregulated by NOTCH.<sup>74, 75</sup> In addition, *HES1* mRNA  
15 expression was analyzed in 14 cases with NOTCH pathway mutations and 13 with wild-  
16 type genes of this pathway by qRT-PCR using a designed human Taqman® Gene  
17 expression Assay for *HES1* (Hs00172878\_m1; Applied Biosystems, Foster City, CA).  
18 Gene expression was quantified by the comparative cycle threshold (Ct) method ( $\Delta\Delta Ct$ )  
19 using *GUS* as endogenous control. All real-time PCR reactions for the individual  
20 samples were performed in triplicate. Results were expressed as relative gene  
21 expression (versus *GUS* gene expression) using arbitrary units.

## 22 **Supplemental References**

- 23
- 24 1. Abubaker J, Bavi PP, Al-Harbi S, Siraj AK, Al-Dayel F, Uddin S, *et al.* PIK3CA  
25 mutations are mutually exclusive with PTEN loss in diffuse large B-cell  
26 lymphoma. *Leukemia* 2007; **21**: 2368-2370.
  - 27
  - 28 2. Asmar F, Punj V, Christensen J, Pedersen MT, Pedersen A, Nielsen AB, *et al.*  
29 Genome-wide profiling identifies a DNA methylation signature that associates  
30 with TET2 mutations in diffuse large B-cell lymphoma. *Haematologica* 2013;  
31 **98**: 1912-1920.
  - 32
  - 33 3. Challa-Malladi M, Lieu YK, Califano O, Holmes AB, Bhagat G, Murty VV, *et*  
34 *al.* Combined genetic inactivation of beta2-Microglobulin and CD58 reveals

- 1 frequent escape from immune recognition in diffuse large B cell lymphoma.  
2 *Cancer cell* 2011; **20**: 728-740.
- 3
- 4 4. Compagno M, Lim WK, Grunn A, Nandula SV, Brahmachary M, Shen Q, *et al.*  
5 Mutations of multiple genes cause deregulation of NF-kappaB in diffuse large  
6 B-cell lymphoma. *Nature* 2009; **459**: 717-721.
- 7
- 8 5. Davis RE, Ngo VN, Lenz G, Tolar P, Young RM, Romesser PB, *et al.* Chronic  
9 active B-cell-receptor signalling in diffuse large B-cell lymphoma. *Nature* 2010;  
10 **463**: 88-92.
- 11
- 12 6. Dong G, Chanudet E, Zeng N, Appert A, Chen YW, Au WY, *et al.* A20, ABIN-  
13 1/2, and CARD11 mutations and their prognostic value in gastrointestinal  
14 diffuse large B-cell lymphoma. *Clinical cancer research : an official journal of*  
15 *the American Association for Cancer Research* 2011; **17**: 1440-1451.
- 16
- 17 7. Du MQ, Peng H, Liu H, Hamoudi RA, Diss TC, Willis TG, *et al.* BCL10 gene  
18 mutation in lymphoma. *Blood* 2000; **95**: 3885-3890.
- 19
- 20 8. Honma K, Tsuzuki S, Nakagawa M, Tagawa H, Nakamura S, Morishima Y, *et*  
21 *al.* TNFAIP3/A20 functions as a novel tumor suppressor gene in several  
22 subtypes of non-Hodgkin lymphomas. *Blood* 2009; **114**: 2467-2475.
- 23
- 24 9. Kato M, Sanada M, Kato I, Sato Y, Takita J, Takeuchi K, *et al.* Frequent  
25 inactivation of A20 in B-cell lymphomas. *Nature* 2009; **459**: 712-716.
- 26
- 27 10. Lee SY, Kumano K, Nakazaki K, Sanada M, Matsumoto A, Yamamoto G, *et al.*  
28 Gain-of-function mutations and copy number increases of Notch2 in diffuse  
29 large B-cell lymphoma. *Cancer science* 2009; **100**: 920-926.
- 30
- 31 11. Lenz G, Davis RE, Ngo VN, Lam L, George TC, Wright GW, *et al.* Oncogenic  
32 CARD11 mutations in human diffuse large B cell lymphoma. *Science* 2008;  
33 **319**: 1676-1679.
- 34
- 35 12. Li H, Kaminski MS, Li Y, Yildiz M, Ouillette P, Jones S, *et al.* Mutations in  
36 linker histone genes HIST1H1 B, C, D, and E; OCT2 (POU2F2); IRF8; and  
37 ARID1A underlying the pathogenesis of follicular lymphoma. *Blood* 2014; **123**:  
38 1487-1498.
- 39
- 40 13. Lohr JG, Stojanov P, Lawrence MS, Auclair D, Chapuy B, Sougnez C, *et al.*  
41 Discovery and prioritization of somatic mutations in diffuse large B-cell

- 1 lymphoma (DLBCL) by whole-exome sequencing. *Proceedings of the National*  
2 *Academy of Sciences of the United States of America* 2012; **109**: 3879-3884.
- 3
- 4 14. Love C, Sun Z, Jima D, Li G, Zhang J, Miles R, *et al.* The genetic landscape of  
5 mutations in Burkitt lymphoma. *Nature genetics* 2012; **44**: 1321-1325.
- 6
- 7 15. Mandelbaum J, Bhagat G, Tang H, Mo T, Brahmachary M, Shen Q, *et al.*  
8 BLIMP1 is a tumor suppressor gene frequently disrupted in activated B cell-like  
9 diffuse large B cell lymphoma. *Cancer cell* 2010; **18**: 568-579.
- 10
- 11 16. Morin RD, Mendez-Lago M, Mungall AJ, Goya R, Mungall KL, Corbett RD, *et*  
12 *al.* Frequent mutation of histone-modifying genes in non-Hodgkin lymphoma.  
13 *Nature* 2011; **476**: 298-303.
- 14
- 15 17. Morin RD, Johnson NA, Severson TM, Mungall AJ, An J, Goya R, *et al.*  
16 Somatic mutations altering EZH2 (Tyr641) in follicular and diffuse large B-cell  
17 lymphomas of germinal-center origin. *Nature genetics* 2010; **42**: 181-185.
- 18
- 19 18. Muppidi JR, Schmitz R, Green JA, Xiao W, Larsen AB, Braun SE, *et al.* Loss of  
20 signalling via Galpha13 in germinal centre B-cell-derived lymphoma. *Nature*  
21 2014; **516**: 254-258.
- 22
- 23 19. Ngo VN, Young RM, Schmitz R, Jhavar S, Xiao W, Lim KH, *et al.*  
24 Oncogenically active MYD88 mutations in human lymphoma. *Nature* 2011;  
25 **470**: 115-119.
- 26
- 27 20. Pasqualucci L, Migliazza A, Basso K, Houldsworth J, Chaganti RS, Dalla-  
28 Favera R. Mutations of the BCL6 proto-oncogene disrupt its negative  
29 autoregulation in diffuse large B-cell lymphoma. *Blood* 2003; **101**: 2914-2923.
- 30
- 31 21. Pasqualucci L, Compagno M, Houldsworth J, Monti S, Grunn A, Nandula SV,  
32 *et al.* Inactivation of the PRDM1/BLIMP1 gene in diffuse large B cell  
33 lymphoma. *The Journal of experimental medicine* 2006; **203**: 311-317.
- 34
- 35 22. Pasqualucci L, Dominguez-Sola D, Chiarenza A, Fabbri G, Grunn A, Trifonov  
36 V, *et al.* Inactivating mutations of acetyltransferase genes in B-cell lymphoma.  
37 *Nature* 2011; **471**: 189-195.
- 38
- 39 23. Pasqualucci L, Neumeister P, Goossens T, Nanjangud G, Chaganti RS, Kuppers  
40 R, *et al.* Hypermutation of multiple proto-oncogenes in B-cell diffuse large-cell  
41 lymphomas. *Nature* 2001; **412**: 341-346.

- 1  
2 24. Pasqualucci L, Trifonov V, Fabbri G, Ma J, Rossi D, Chiarenza A, *et al.*  
3 Analysis of the coding genome of diffuse large B-cell lymphoma. *Nature*  
4 *genetics* 2011; **43**: 830-837.
- 5  
6 25. Richter J, Schlesner M, Hoffmann S, Kreuz M, Leich E, Burkhardt B, *et al.*  
7 Recurrent mutation of the ID3 gene in Burkitt lymphoma identified by  
8 integrated genome, exome and transcriptome sequencing. *Nature genetics* 2012;  
9 **44**: 1316-1320.
- 10  
11 26. Schif B, Lennerz JK, Kohler CW, Bentink S, Kreuz M, Melzner I, *et al.* SOCS1  
12 mutation subtypes predict divergent outcomes in diffuse large B-Cell lymphoma  
13 (DLBCL) patients. *Oncotarget* 2013; **4**: 35-47.
- 14  
15 27. Schmitz R, Young RM, Ceribelli M, Jhavar S, Xiao W, Zhang M, *et al.* Burkitt  
16 lymphoma pathogenesis and therapeutic targets from structural and functional  
17 genomics. *Nature* 2012; **490**: 116-120.
- 18  
19 28. Schuetz JM, Johnson NA, Morin RD, Scott DW, Tan K, Ben-Nierah S, *et al.*  
20 BCL2 mutations in diffuse large B-cell lymphoma. *Leukemia* 2012; **26**: 1383-  
21 1390.
- 22  
23 29. Trinh DL, Scott DW, Morin RD, Mendez-Lago M, An J, Jones SJ, *et al.*  
24 Analysis of FOXO1 mutations in diffuse large B-cell lymphoma. *Blood* 2013;  
25 **121**: 3666-3674.
- 26  
27 30. Xu-Monette ZY, Wu L, Visco C, Tai YC, Tzankov A, Liu WM, *et al.*  
28 Mutational profile and prognostic significance of TP53 in diffuse large B-cell  
29 lymphoma patients treated with R-CHOP: report from an International DLBCL  
30 Rituximab-CHOP Consortium Program Study. *Blood* 2012; **120**: 3986-3996.
- 31  
32 31. Ying CY, Dominguez-Sola D, Fabi M, Lorenz IC, Hussein S, Bansal M, *et al.*  
33 MEF2B mutations lead to deregulated expression of the oncogene BCL6 in  
34 diffuse large B cell lymphoma. *Nature immunology* 2013; **14**: 1084-1092.
- 35  
36 32. Zhang J, Grubor V, Love CL, Banerjee A, Richards KL, Mieczkowski PA, *et al.*  
37 Genetic heterogeneity of diffuse large B-cell lymphoma. *Proceedings of the*  
38 *National Academy of Sciences of the United States of America* 2013; **110**: 1398-  
39 1403.
- 40  
41 33. Lawrence MS, Stojanov P, Polak P, Kryukov GV, Cibulskis K, Sivachenko A,  
42 *et al.* Mutational heterogeneity in cancer and the search for new cancer-

- 1 associated genes. *Nature* 2013; **499**: 214-218.
- 2
- 3 34. Puente XS, Bea S, Valdes-Mas R, Villamor N, Gutierrez-Abril J, Martin-Subero  
4 JI, *et al.* Non-coding recurrent mutations in chronic lymphocytic leukaemia.  
5 *Nature* 2015; **526**: 519-524.
- 6
- 7 35. Wang K, Li M, Hakonarson H. ANNOVAR: functional annotation of genetic  
8 variants from high-throughput sequencing data. *Nucleic acids research* 2010;  
9 **38**: e164.
- 10
- 11 36. Minde DP, Anvarian Z, Rudiger SG, Maurice MM. Messing up disorder: how  
12 do missense mutations in the tumor suppressor protein APC lead to cancer?  
13 *Molecular cancer* 2011; **10**: 101.
- 14
- 15 37. Morin RD, Mungall K, Pleasance E, Mungall AJ, Goya R, Huff RD, *et al.*  
16 Mutational and structural analysis of diffuse large B-cell lymphoma using  
17 whole-genome sequencing. *Blood* 2013; **122**: 1256-1265.
- 18
- 19 38. Davies H, Bignell GR, Cox C, Stephens P, Edkins S, Clegg S, *et al.* Mutations  
20 of the BRAF gene in human cancer. *Nature* 2002; **417**: 949-954.
- 21
- 22 39. Bohers E, Mareschal S, Bouzelfen A, Marchand V, Ruminy P, Maingonnat C, *et*  
23 *al.* Targetable activating mutations are very frequent in GCB and ABC diffuse  
24 large B-cell lymphoma. *Genes, chromosomes & cancer* 2014; **53**: 144-153.
- 25
- 26 40. Mullighan CG, Zhang J, Kasper LH, Lerach S, Payne-Turner D, Phillips LA, *et*  
27 *al.* CREBBP mutations in relapsed acute lymphoblastic leukaemia. *Nature* 2011;  
28 **471**: 235-239.
- 29
- 30 41. Peifer M, Fernandez-Cuesta L, Sos ML, George J, Seidel D, Kasper LH, *et al.*  
31 Integrative genome analyses identify key somatic driver mutations of small-cell  
32 lung cancer. *Nature genetics* 2012; **44**: 1104-1110.
- 33
- 34 42. Hambleton S, Salem S, Bustamante J, Bigley V, Boisson-Dupuis S, Azevedo J,  
35 *et al.* IRF8 mutations and human dendritic-cell immunodeficiency. *The New*  
36 *England journal of medicine* 2011; **365**: 127-138.
- 37
- 38 43. Heinrich MC, Owzar K, Corless CL, Hollis D, Borden EC, Fletcher CD, *et al.*  
39 Correlation of kinase genotype and clinical outcome in the North American  
40 Intergroup Phase III Trial of imatinib mesylate for treatment of advanced  
41 gastrointestinal stromal tumor: CALGB 150105 Study by Cancer and Leukemia

- 1 Group B and Southwest Oncology Group. *Journal of clinical oncology : official*  
2 *journal of the American Society of Clinical Oncology* 2008; **26**: 5360-5367.
- 3
- 4 44. Fan HY, Richards JS. Minireview: physiological and pathological actions of  
5 RAS in the ovary. *Molecular endocrinology* 2010; **24**: 286-298.
- 6
- 7 45. Puente XS, Pinyol M, Quesada V, Conde L, Ordonez GR, Villamor N, *et al.*  
8 Whole-genome sequencing identifies recurrent mutations in chronic  
9 lymphocytic leukaemia. *Nature* 2011; **475**: 101-105.
- 10
- 11 46. Kiel MJ, Velusamy T, Betz BL, Zhao L, Weigelin HG, Chiang MY, *et al.*  
12 Whole-genome sequencing identifies recurrent somatic NOTCH2 mutations in  
13 splenic marginal zone lymphoma. *The Journal of experimental medicine* 2012;  
14 **209**: 1553-1565.
- 15
- 16 47. Rossi D, Trifonov V, Fangazio M, Bruscaggin A, Rasi S, Spina V, *et al.* The  
17 coding genome of splenic marginal zone lymphoma: activation of NOTCH2 and  
18 other pathways regulating marginal zone development. *The Journal of*  
19 *experimental medicine* 2012; **209**: 1537-1551.
- 20
- 21 48. Urlick ME, Rudd ML, Godwin AK, Sgroi D, Merino M, Bell DW. PIK3R1  
22 (p85alpha) is somatically mutated at high frequency in primary endometrial  
23 cancer. *Cancer research* 2011; **71**: 4061-4067.
- 24
- 25 49. Koskela HL, Eldfors S, Ellonen P, van Adrichem AJ, Kuusanmaki H, Andersson  
26 EI, *et al.* Somatic STAT3 mutations in large granular lymphocytic leukemia.  
27 *The New England journal of medicine* 2012; **366**: 1905-1913.
- 28
- 29 50. Fasan A, Kern W, Grossmann V, Haferlach C, Haferlach T, Schnittger S.  
30 STAT3 mutations are highly specific for large granular lymphocytic leukemia.  
31 *Leukemia* 2013; **27**: 1598-1600.
- 32
- 33 51. Ohgami RS, Ma L, Merker JD, Martinez B, Zehnder JL, Arber DA. STAT3  
34 mutations are frequent in CD30+ T-cell lymphomas and T-cell large granular  
35 lymphocytic leukemia. *Leukemia* 2013; **27**: 2244-2247.
- 36
- 37 52. Ritz O, Guiter C, Castellano F, Dorsch K, Melzner J, Jais JP, *et al.* Recurrent  
38 mutations of the STAT6 DNA binding domain in primary mediastinal B-cell  
39 lymphoma. *Blood* 2009; **114**: 1236-1242.
- 40
- 41 53. Zhao S, Choi M, Overton JD, Bellone S, Roque DM, Cocco E, *et al.* Landscape

- 1 of somatic single-nucleotide and copy-number mutations in uterine serous  
2 carcinoma. *Proceedings of the National Academy of Sciences of the United*  
3 *States of America* 2013; **110**: 2916-2921.
- 4
- 5 54. Delhommeau F, Dupont S, Della Valle V, James C, Trannoy S, Masse A, *et al.*  
6 Mutation in TET2 in myeloid cancers. *The New England journal of medicine*  
7 2009; **360**: 2289-2301.
- 8
- 9 55. Reva B, Antipin Y, Sander C. Predicting the functional impact of protein  
10 mutations: application to cancer genomics. *Nucleic acids research* 2011; **39**:  
11 e118.
- 12
- 13 56. Kumar P, Henikoff S, Ng PC. Predicting the effects of coding non-synonymous  
14 variants on protein function using the SIFT algorithm. *Nature protocols* 2009; **4**:  
15 1073-1081.
- 16
- 17 57. Tamborero D, Gonzalez-Perez A, Lopez-Bigas N. OncodriveCLUST: exploiting  
18 the positional clustering of somatic mutations to identify cancer genes.  
19 *Bioinformatics* 2013; **29**: 2238-2244.
- 20
- 21 58. Carter H, Chen S, Isik L, Tyekuceva S, Velculescu VE, Kinzler KW, *et al.*  
22 Cancer-specific high-throughput annotation of somatic mutations: computational  
23 prediction of driver missense mutations. *Cancer research* 2009; **69**: 6660-6667.
- 24
- 25 59. Gonzalez-Perez A, Lopez-Bigas N. Improving the assessment of the outcome of  
26 nonsynonymous SNVs with a consensus deleteriousness score, Condel.  
27 *American journal of human genetics* 2011; **88**: 440-449.
- 28
- 29 60. Shihab HA, Gough J, Cooper DN, Day IN, Gaunt TR. Predicting the functional  
30 consequences of cancer-associated amino acid substitutions. *Bioinformatics*  
31 2013; **29**: 1504-1510.
- 32
- 33 61. Schwarz JM, Rodelsperger C, Schuelke M, Seelow D. MutationTaster evaluates  
34 disease-causing potential of sequence alterations. *Nature methods* 2010; **7**: 575-  
35 576.
- 36
- 37 62. Adzhubei IA, Schmidt S, Peshkin L, Ramensky VE, Gerasimova A, Bork P, *et*  
38 *al.* A method and server for predicting damaging missense mutations. *Nature*  
39 *methods* 2010; **7**: 248-249.
- 40
- 41 63. Scholtysik R, Kreuz M, Hummel M, Rosolowski M, Szczepanowski M, Klapper

- 1 W, *et al.* Characterization of genomic imbalances in diffuse large B-cell  
2 lymphoma by detailed SNP-chip analysis. *International journal of cancer*  
3 *Journal international du cancer* 2015; **136**: 1033-1042.
- 4
- 5 64. Bea S, Zettl A, Wright G, Salaverria I, Jehn P, Moreno V, *et al.* Diffuse large B-  
6 cell lymphoma subgroups have distinct genetic profiles that influence tumor  
7 biology and improve gene-expression-based survival prediction. *Blood* 2005;  
8 **106**: 3183-3190.
- 9
- 10 65. Monti S, Chapuy B, Takeyama K, Rodig SJ, Hao Y, Yeda KT, *et al.* Integrative  
11 analysis reveals an outcome-associated and targetable pattern of p53 and cell  
12 cycle deregulation in diffuse large B cell lymphoma. *Cancer cell* 2012; **22**: 359-  
13 372.
- 14
- 15 66. Lenz G, Wright GW, Emre NC, Kohlhammer H, Dave SS, Davis RE, *et al.*  
16 Molecular subtypes of diffuse large B-cell lymphoma arise by distinct genetic  
17 pathways. *Proceedings of the National Academy of Sciences of the United States*  
18 *of America* 2008; **105**: 13520-13525.
- 19
- 20 67. Kameoka Y, Tagawa H, Tsuzuki S, Karnan S, Ota A, Suguro M, *et al.* Contig  
21 array CGH at 3p14.2 points to the FRA3B/FHIT common fragile region as the  
22 target gene in diffuse large B-cell lymphoma. *Oncogene* 2004; **23**: 9148-9154.
- 23
- 24 68. Takeyama K, Monti S, Manis JP, Dal Cin P, Getz G, Beroukhim R, *et al.*  
25 Integrative analysis reveals 53BP1 copy loss and decreased expression in a  
26 subset of human diffuse large B-cell lymphomas. *Oncogene* 2008; **27**: 318-322.
- 27
- 28 69. Gonzalez-Aguilar A, Idbaih A, Boisselier B, Habbita N, Rossetto M, Laurence  
29 A, *et al.* Recurrent mutations of MYD88 and TBL1XR1 in primary central  
30 nervous system lymphomas. *Clinical cancer research : an official journal of the*  
31 *American Association for Cancer Research* 2012; **18**: 5203-5211.
- 32
- 33 70. Bertrand P, Maingonnat C, Penther D, Guney S, Ruminy P, Picquenot JM, *et al.*  
34 The costimulatory molecule CD70 is regulated by distinct molecular  
35 mechanisms and is associated with overall survival in diffuse large B-cell  
36 lymphoma. *Genes, chromosomes & cancer* 2013; **52**: 764-774.
- 37
- 38 71. Salaverria I, Martin-Garcia D, Lopez C, Clot G, Garcia-Aragones M, Navarro A,  
39 *et al.* Detection of chromothripsis-like patterns with a custom array platform for  
40 chronic lymphocytic leukemia. *Genes, chromosomes & cancer* 2015; **54**: 668-  
41 680.
- 42



- 1 72. Scott DW, Wright GW, Williams PM, Lih CJ, Walsh W, Jaffe ES, *et al.*  
2 Determining cell-of-origin subtypes of diffuse large B-cell lymphoma using  
3 gene expression in formalin-fixed paraffin-embedded tissue. *Blood* 2014; **123**:  
4 1214-1217.
- 5  
6 73. Wright G, Tan B, Rosenwald A, Hurt EH, Wiestner A, Staudt LM. A gene  
7 expression-based method to diagnose clinically distinct subgroups of diffuse  
8 large B cell lymphoma. *Proceedings of the National Academy of Sciences of the*  
9 *United States of America* 2003; **100**: 9991-9996.
- 10  
11 74. Sharma VM, Calvo JA, Draheim KM, Cunningham LA, Hermance N, Beverly L,  
12 *et al.* Notch1 contributes to mouse T-cell leukemia by directly inducing the  
13 expression of c-myc. *Molecular and cellular biology* 2006; **26**: 8022-8031.
- 14  
15 75. Weng AP, Millholland JM, Yashiro-Ohtani Y, Arcangeli ML, Lau A, Wai C, *et*  
16 *al.* c-Myc is an important direct target of Notch1 in T-cell acute lymphoblastic  
17 leukemia/lymphoma. *Genes & development* 2006; **20**: 2096-2109.
- 18  
19

Supplemental Figure 1. PFS and OS in training and validation series.

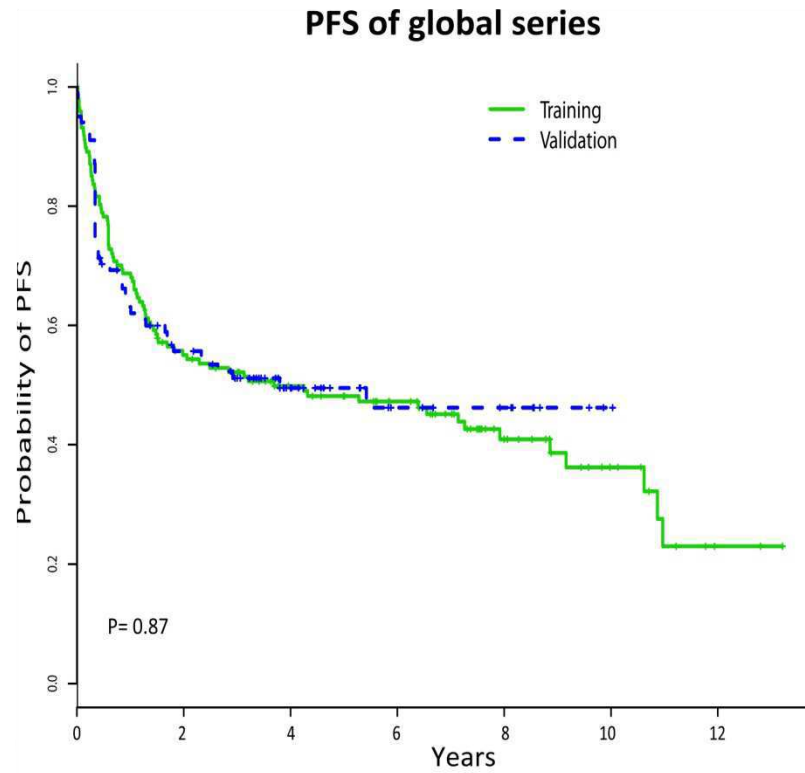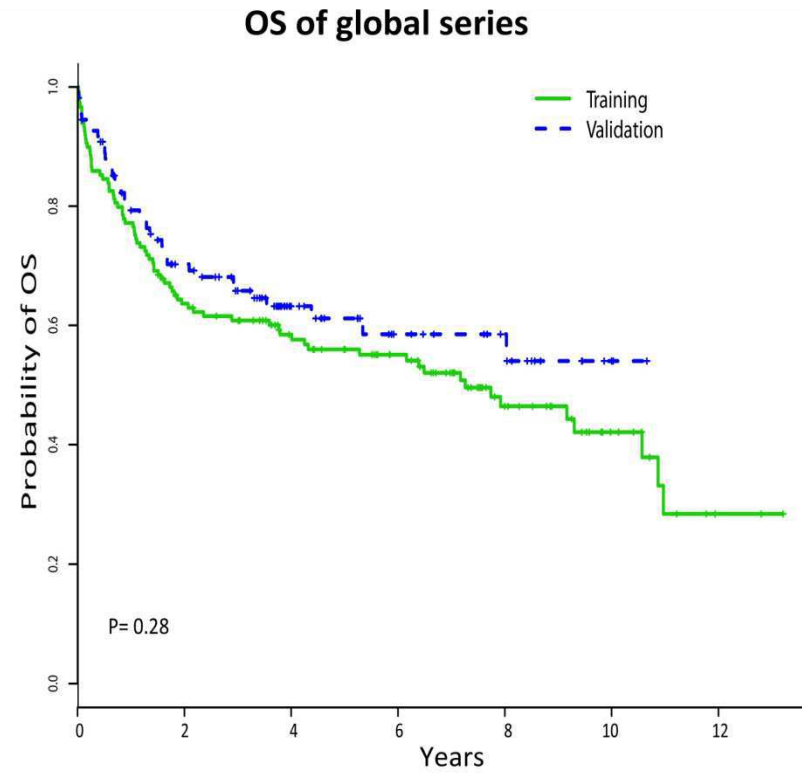

Supplemental Figure 2: Pipeline followed to filter potential driver mutations in 150 DLBCL samples

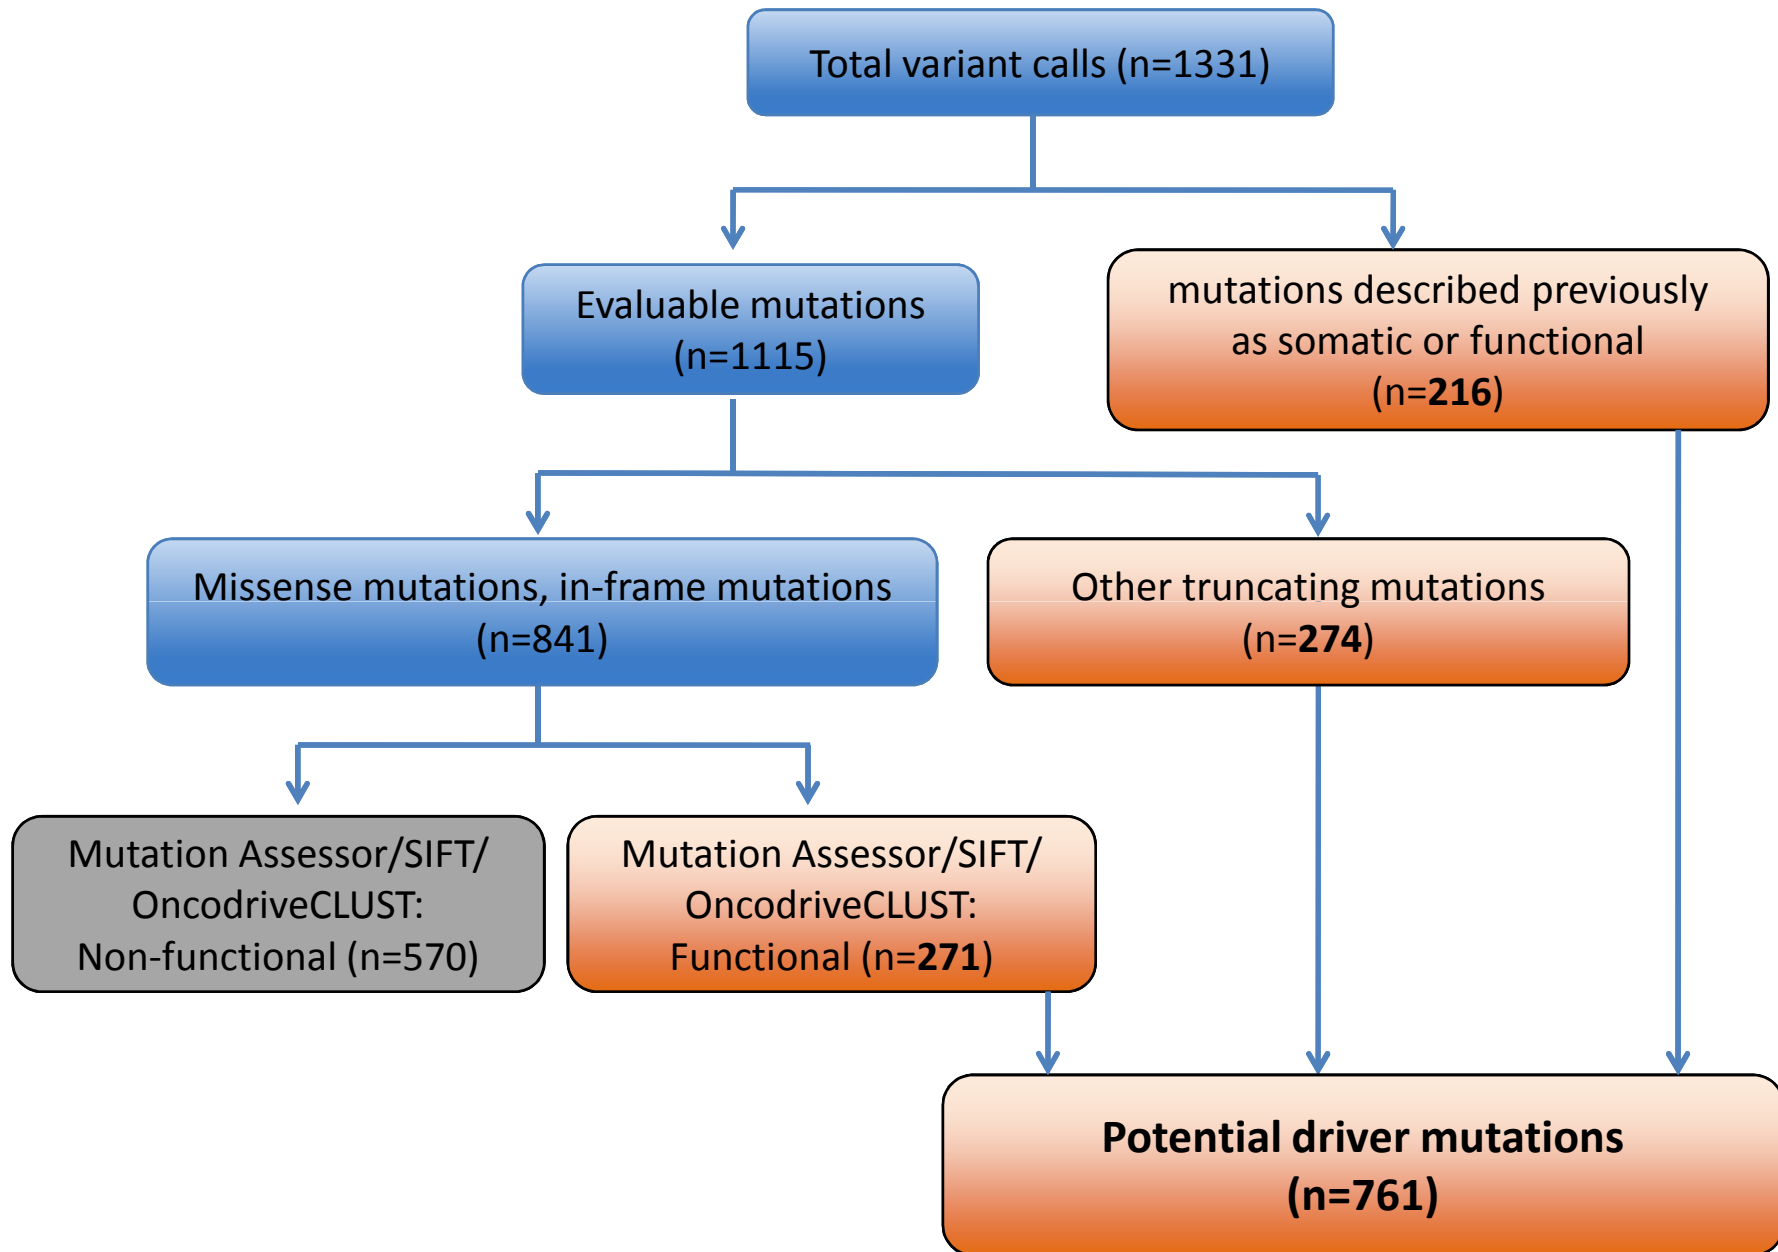

# Supplemental Figure 3. Genetic alterations characterized in 150 DLBCL patients.

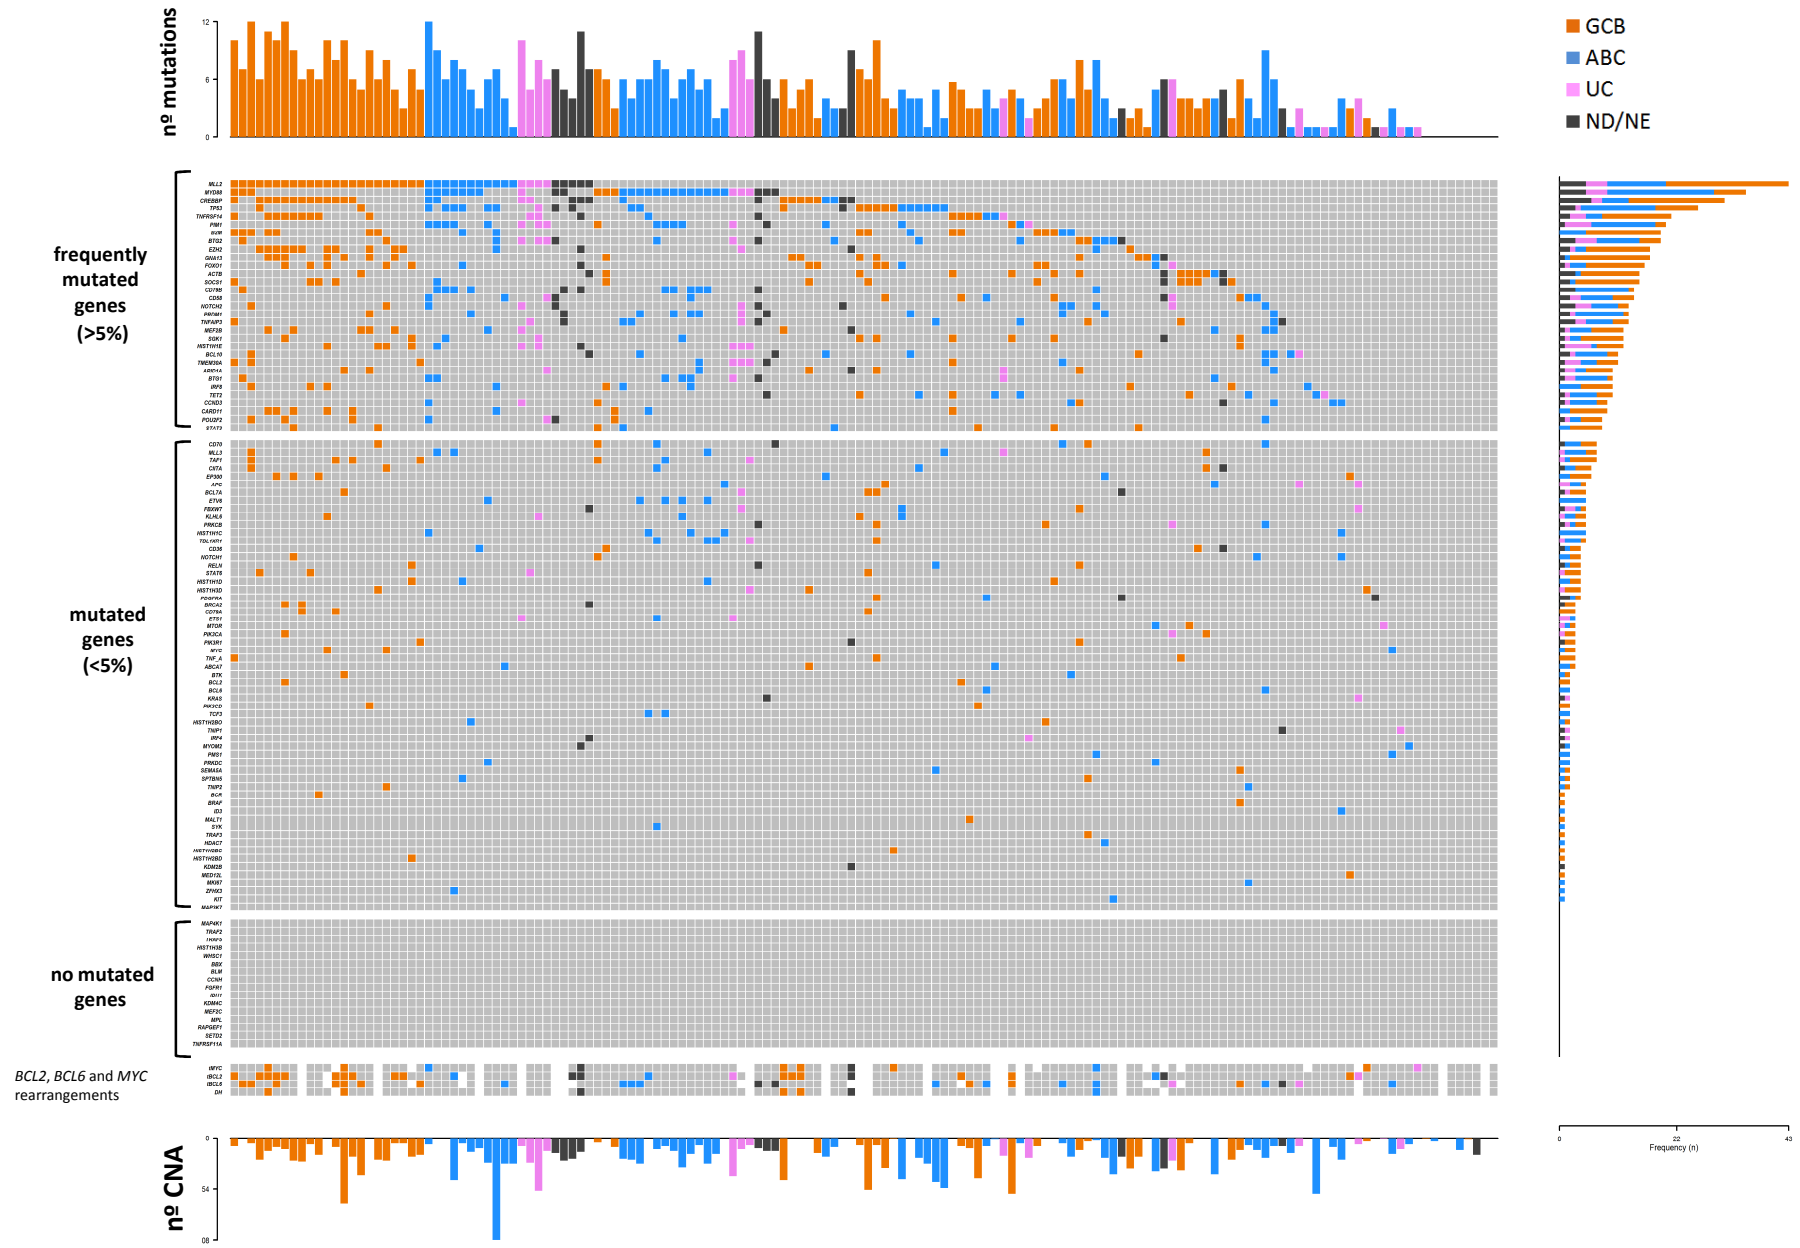

# Supplemental Figure 4. Alterations of four genes in the common deleted 6q14-q23 region.

A

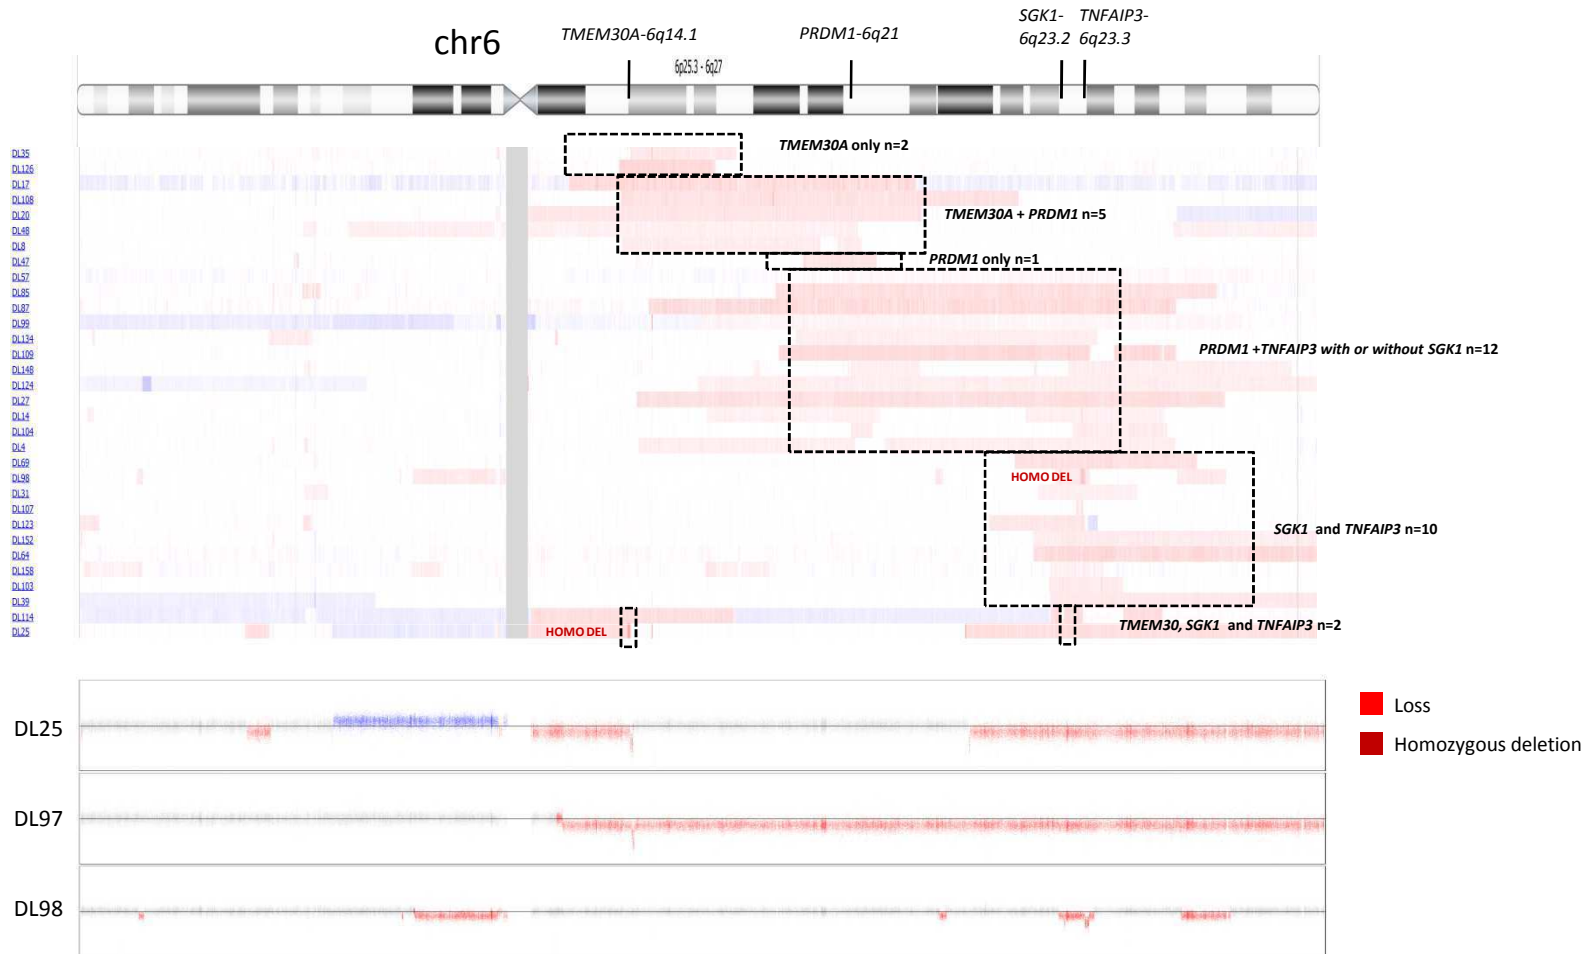

B

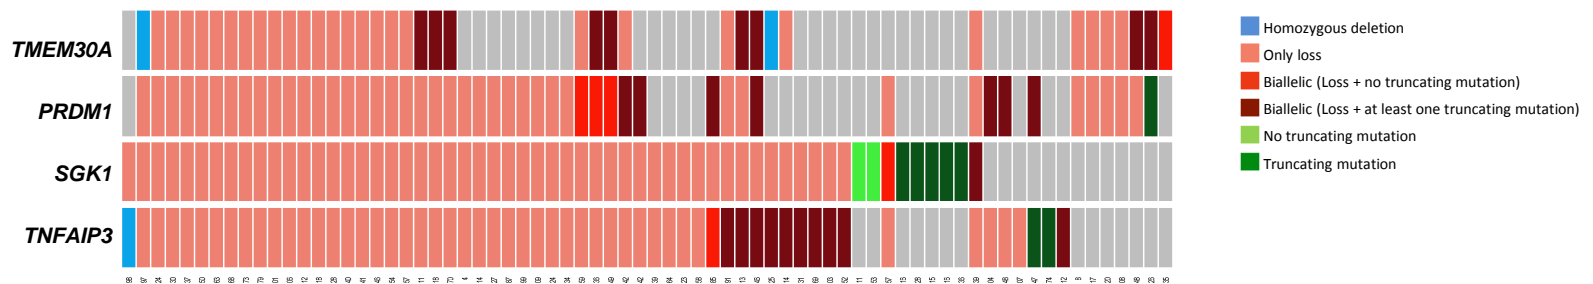

# Supplemental Figure 5. Chromothripsis-like patterns detected in DLBCL cases.

**A**

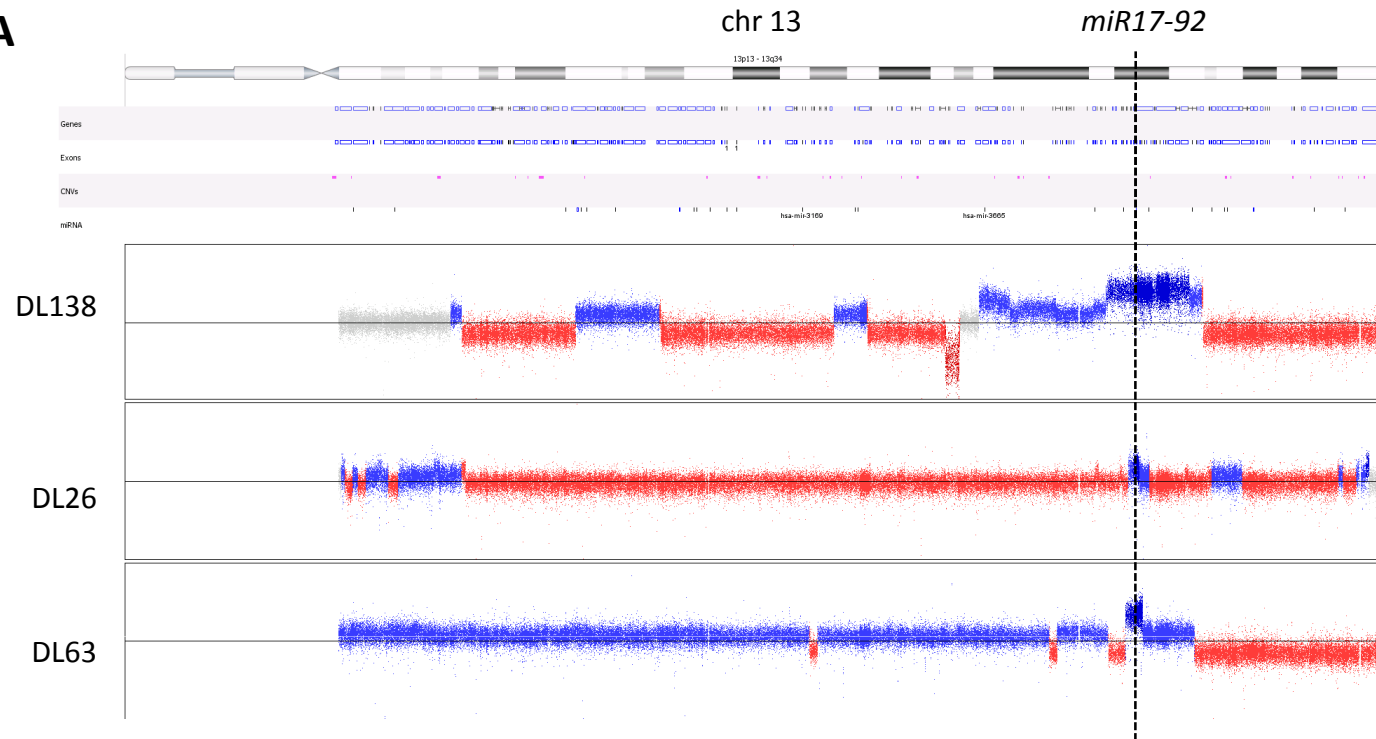

**B**

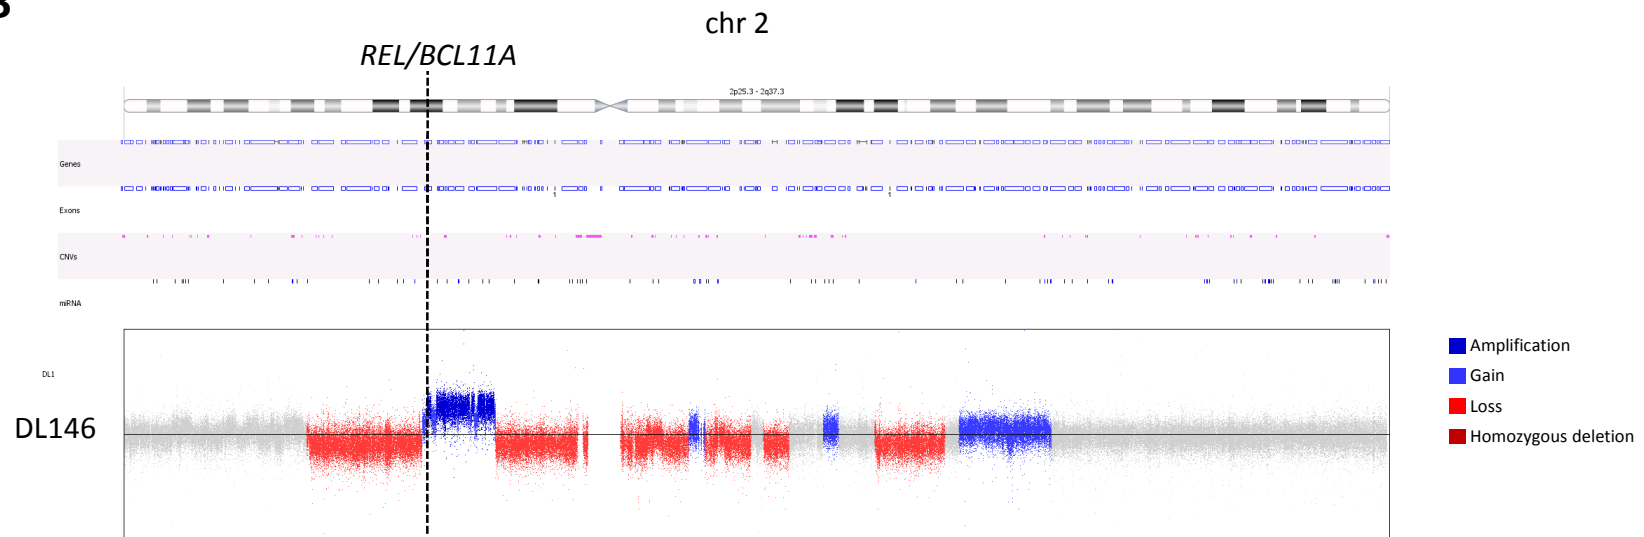

# Supplemental Figure 6. GSEAs of *SGK1* and NOTCH pathway mutated cases vs not mutated.

A

**Mutated in *SGK1* (4) vs  
Not mutated in Notch Pathway (27)**

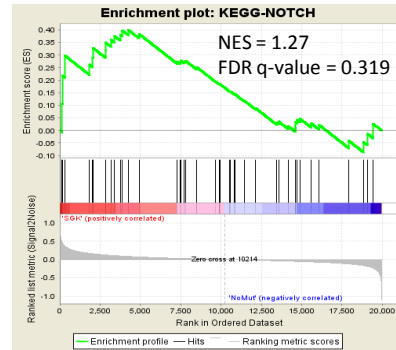

B

**Mutated in *NOTCH* pathway (12) vs  
Not mutated in Notch Pathway (27)**

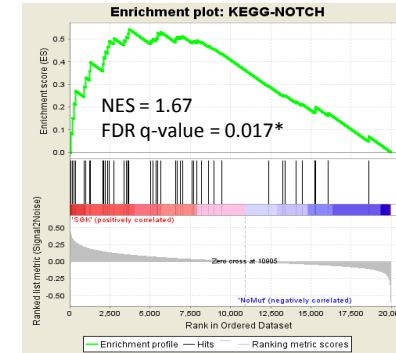

Genes up-regulated by Notch signalling pathway

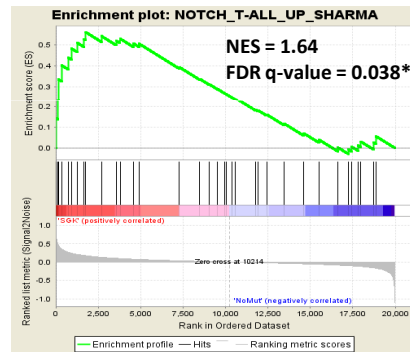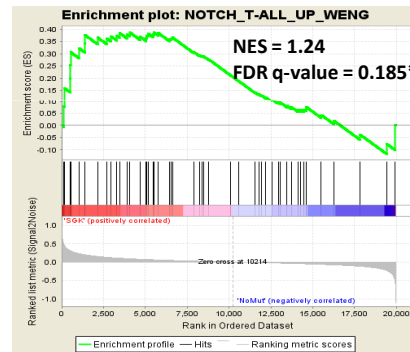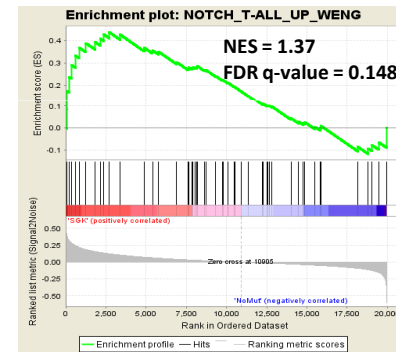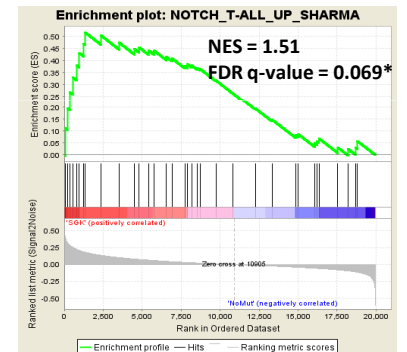

Genes down-regulated by Notch signalling pathway

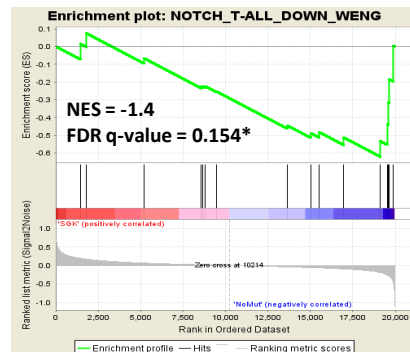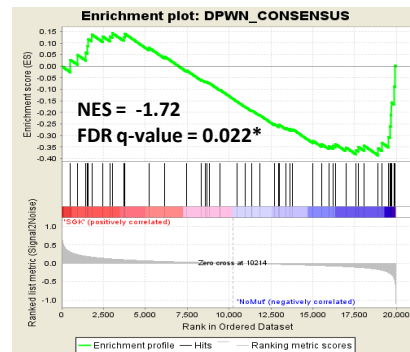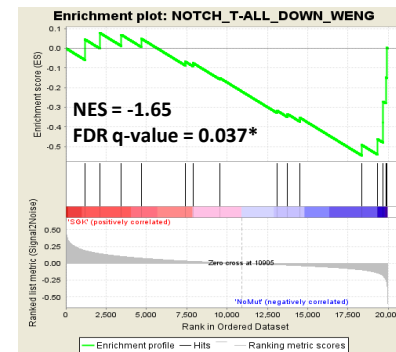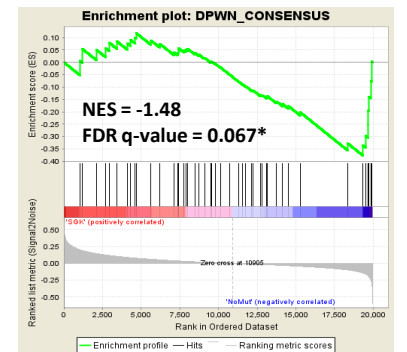

Supplement: leu2017251x1.pdf [file leu2017251x1.pdf]
